# Supplementary material for: Computational insights into different inhibition modes of the κ-opioid receptor with antagonists LY2456302 and JDTic
Source: Royal Society of Chemistry journal article supplement (doi:10.1039/c5ra24911b), 2016-01-01
Supplement: c5ra24911b1.pdf [file c5ra24911b1.pdf]

## Support information

**Table S1** *In vitro* binding affinity and half-time of JDtic and LY2456302 at human  $\kappa$ -OR<sup>[1-3]</sup>.

|           | Receptor binding affinity |                                       | $t_{1/2}$ (h) in plasma<br>(PO) | $ratio_{RT(LY2./JDtic)}$ |
|-----------|---------------------------|---------------------------------------|---------------------------------|--------------------------|
|           | $K_i$ (nM)                | $\Delta G_{binding}^{exp}$ (kcal/mol) |                                 |                          |
| JDtic     | 0.031                     | -14.90                                | About 1.5                       | 2.53                     |
| LY2456302 | 0.807                     | -12.90                                | 3.8                             |                          |

<sup>a</sup>  $\Delta G_{binding}^{exp}$ : calculated from the experimental data via  $\Delta G_{binding}^{exp} \approx RT \ln K$  at T = 310 K. The binding energies were calculated based on  $K_i$  values.

**Table S2** Percentage and average RMSD in angstroms of JDtic/LY2456302 that compose the clusters in the metadynamics simulation.

|           | JDtic      |      | LY2456302 (60 ns system) |      |
|-----------|------------|------|--------------------------|------|
|           | Percentage | RMSD | Percentage               | RMSD |
| cluster A | 48.6       | 0.41 | 35.7                     | 0.61 |
| cluster B | 41.4       | 1.39 | 36.8                     | 1.53 |
| cluster C | 6.2        | 1.41 | 2.9                      | 2.14 |
| cluster D | --         | --   | 3.6                      | 3.14 |
| Total     | 96.2       |      | 79.0                     |      |

**Table S3.** The relationship between the LY2456302/JDtic conformations at min/min0/max states and the corresponding cluster these ligands were affiliated in the metadynamics simulation.

|                  | min state  | min0 state | max state |
|------------------|------------|------------|-----------|
| LY2456302 system | cluster A1 | cluster A4 | cluster D |
| JDtic system     | cluster A1 | cluster B2 | cluster C |

## Support information

**Fig. S1** (A) RMSD calculations of proteins in unbiased JD<sub>Tic</sub>/LY2456302- $\kappa$ -OR systems. (B) RMSF values of all residues from 250 ns to 300 ns in the two systems. (C) Alignment of the final 300 ns JD<sub>Tic</sub>- $\kappa$ -OR frame with initial crystal structure.

**Fig. S2** (A) Structural features of LY2456302- $\kappa$ -OR complexes for the cluster B1 (green), cluster C1 (blue) and cluster D1 (pink) during the ligand egress. (B) The variation of the side chain torsion of Y313<sup>7,36</sup> along the time evolution. (C) Evolution of the distance between N<sup>+</sup> in ligands and the conserved residue D138<sup>3,32</sup> in the metadynamics simulation.

**Fig. S3 Metastable states in the additional LY2456302- $\kappa$ -OR system.** (A) The binding free energy surface for the dissociation of LY2456302 from  $\kappa$ -OR as a function of the Z-component of the vector connecting the nitrogen ion on the pyrrolidine group of the ligand and residue D138<sup>3,32</sup> and RMSDs of LY2456302. (B) Structural characterization of the two main energy basins B0-B1 in the metadynamics simulation.

**Fig. S4** (A/B) Structural features of LY2456302- $\kappa$ -OR (A) and JD<sub>Tic</sub>- $\kappa$ -OR (B) complexes for the min state (green), min0 state (blue) and max state (pink) during the ligand egress.

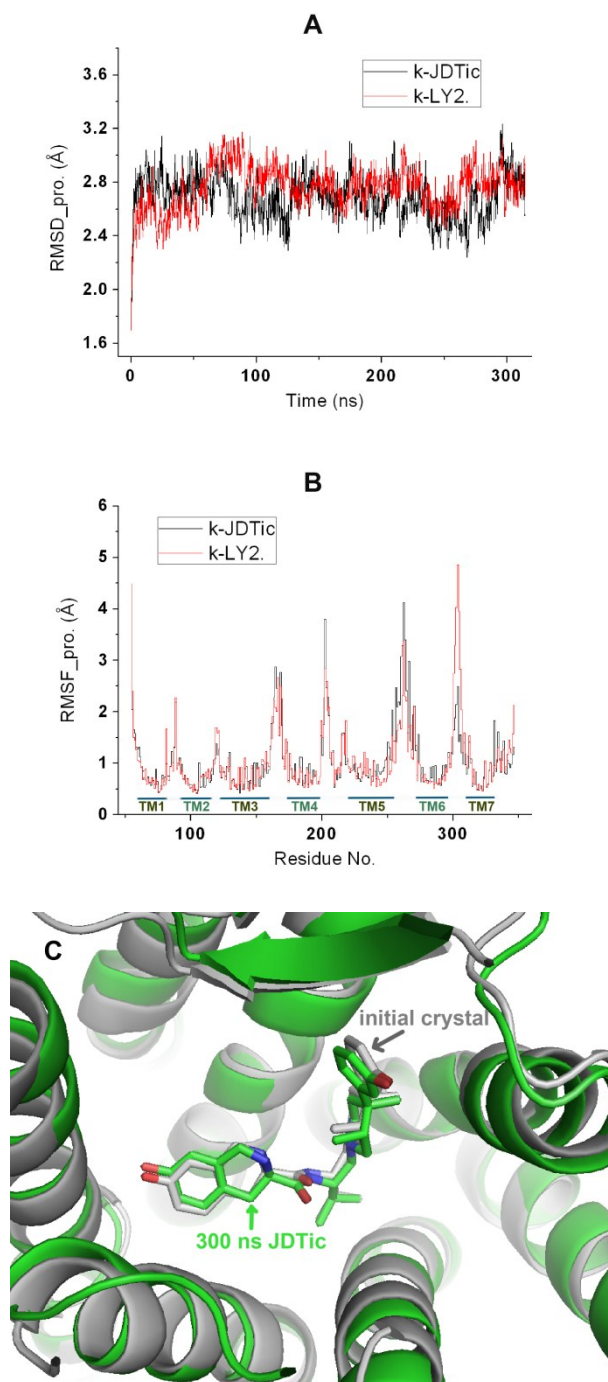

**Fig. S1** (A) RMSD calculations of proteins in unbiased JDTic/LY2456302- $\kappa$ -OR systems. (B) RMSF values of all residues from 250 ns to 300 ns in the two systems. (C) Alignment of the final 300 ns JDTic- $\kappa$ -OR frame with initial crystal structure.

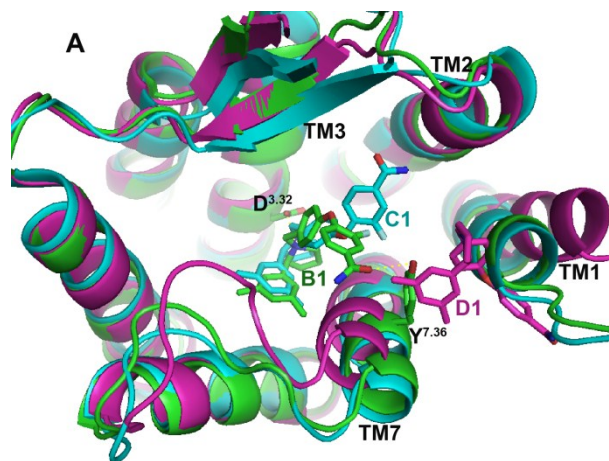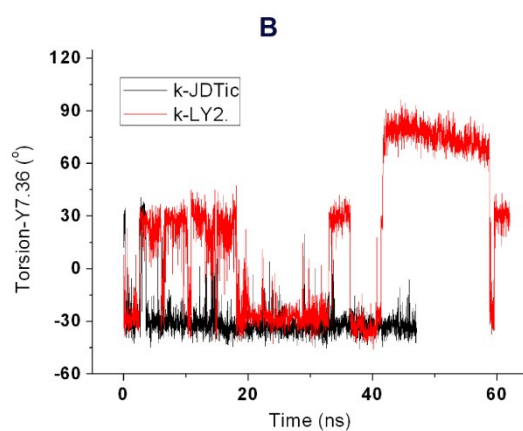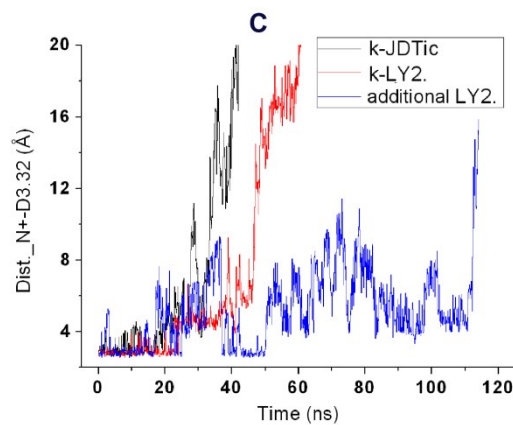

**Fig. S2** (A) Structural features of LY2456302- $\kappa$ -OR complexes for the cluster B1 (green), cluster C1 (blue) and cluster D1 (pink) during the ligand egress. (B) The variation of the side chain torsion of Y313<sup>7.36</sup> along the time evolution. (C) Evolution of the distance between N<sup>+</sup> in ligands and the conserved residue D138<sup>3.32</sup> in the metadynamics simulation.

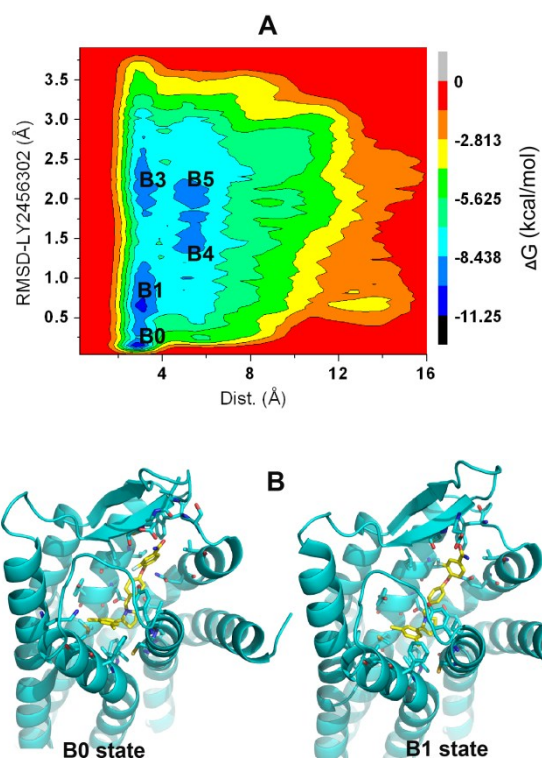

**Fig. S3 Metastable states in the additional LY2456302- $\kappa$ -OR system.** (A) The binding free energy surface for the dissociation of LY2456302 from  $\kappa$ -OR as a function of the Z-component of the vector connecting the nitrogen ion on the pyrrolidine group of the ligand and residue D138<sup>3.32</sup> and RMSDs of LY2456302. (B) Structural characterization of the two main energy basins B0-B1 in the metadynamics simulation.

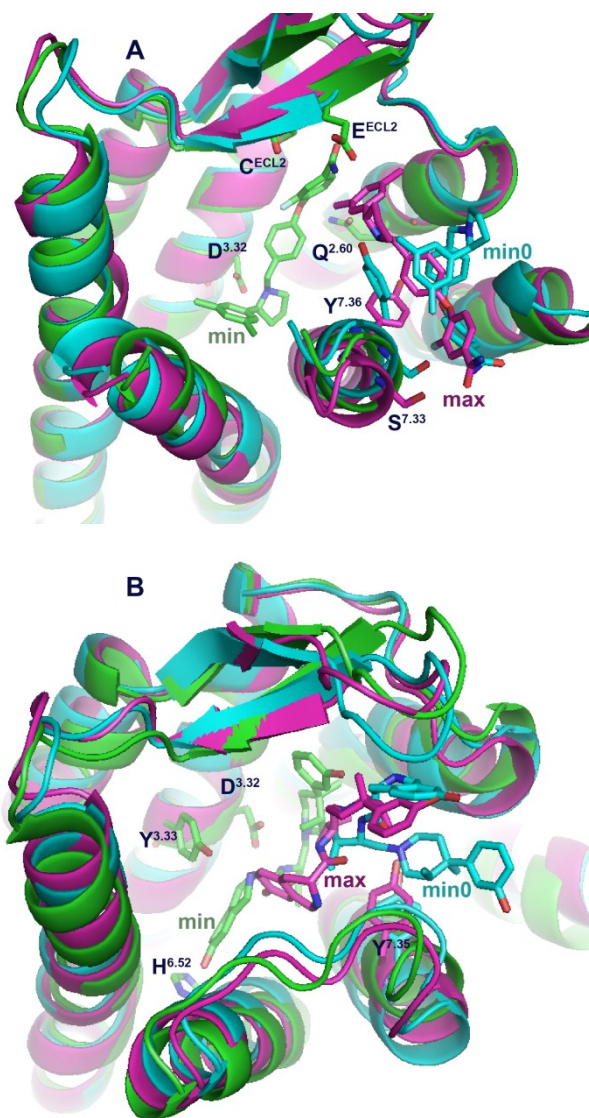

**Fig. S4** (A/B) Structural features of LY2456302- $\kappa$ -OR (A) and JDtic- $\kappa$ -OR (B) complexes for the min state (green), min0 state (blue) and max state (pink) during the ligand egress.

**Reference:**

- [1]. Carroll I, et al. Pharmacological properties of JDtic: a novel kappa-opioid receptor antagonist. *Eur J Pharmacol*, 2004, 501(1-3): 111-119.
- [2]. Munro T A, et al. Long-acting kappa opioid antagonists nor-BNI, GNTI and JDtic: pharmacokinetics in mice and lipophilicity. *BMC Pharmacol*, 2012, 12: 1-18.
- [3]. Rorick-Kehn L M, et al. LY2456302 is a novel, potent, orally-bioavailable small molecule kappa-selective antagonist with activity in animal models predictive of efficacy in mood and addictive disorders. *Neuropharmacology*, 2014, 77: 131-144.
